# Supplementary material
Source: HighWire-hosted journal article supplement (https://heart.bmj.com/content/109/13/992)

## Physical activity and non-sustained ventricular tachycardia in arrhythmogenic cardiomyopathy

Javier Ramos-Maqueda,<sup>\*,1,2</sup> Jairo H. Migueles,<sup>\*,3,4</sup> María Molina-Jiménez,<sup>5,6</sup> David Ruiz-González,<sup>7,8</sup> Eva Cabrera-Borrego,<sup>5</sup> Amalio Ruiz Salas,<sup>9</sup> Alberto Soriano-Maldonado,<sup>\*\*,7,8</sup> Juan Jiménez-Jáimez,<sup>\*\*,5,6</sup>

\* These authors contributed equally and share the first authorship.

\*\* These authors contributed equally and share the senior authorship.

<sup>1</sup> Cardiology Department, Lozano Blesa Clinical University Hospital, Zaragoza, Spain.

<sup>2</sup> Aragon Institute of Biohealth Research, Zaragoza, Spain.

<sup>3</sup> Department of Biosciences and Nutrition, Karolinska Institutet, Huddinge, Sweden.

<sup>4</sup> PROFITH “PRoMoting FITness and Health through physical activity” Research Group, Sport and Health University Research Institute (iMUDS), Department of Physical Education and Sports, Faculty of Sport Sciences, University of Granada, Granada, Spain.

<sup>5</sup> Cardiology Department, Hospital Universitario Virgen de las Nieves, Granada, Spain.

<sup>6</sup> Granada Institute of Biohealth Research, Granada, Spain.

<sup>7</sup> Department of Education, Faculty of Education Sciences, University of Almería, Almería, Spain.

<sup>8</sup> SPORT Research Group (CTS 1024), CERNEP Research Center, University of Almería, Almería, Spain.

<sup>9</sup> Cardiology Department, Hospital Universitario Virgen de la Victoria, Málaga, Spain.

### Supplement 2

Examples of ECG signals during the occurrence of two RR-NSVTs observed in this study.

ECG: electrocardiogram; RR-NSVT: rapid-rate non-sustained ventricular tachycardia.

EAC007\_24.05.2019\_18.53

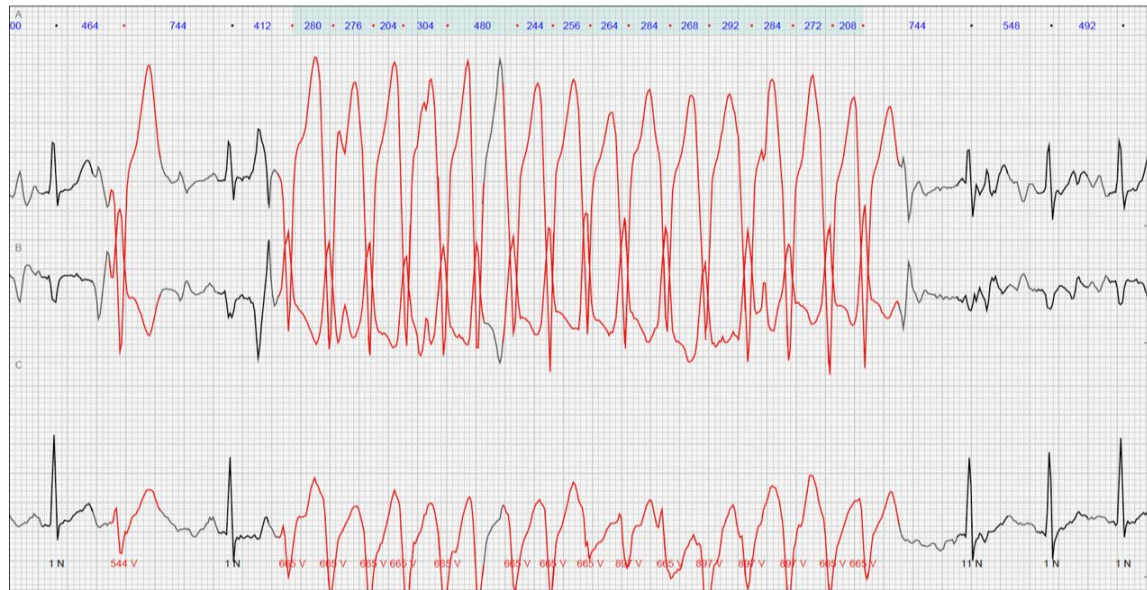

EAC\_072\_15.02.21\_16.49

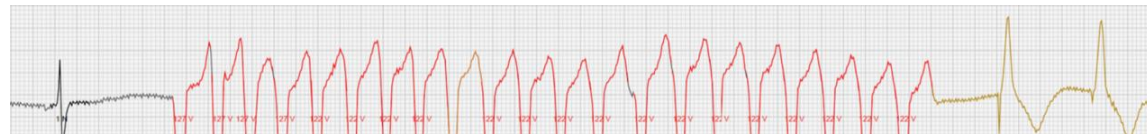

Supplement: inline-supplementary-material-2 [file inline-supplementary-material-2.pdf]
